# Supplementary material for: A Facile and Rapid Strategy for Quantifying PCBs in Cereals Based on Dispersive Solid-Phase Extraction and Gas Chromatography–Mass Spectrometry: A Reference for Safety Concerns in Sustainable Textiles
Source: MDPI journal article supplement (doi:10.3390/ma16041698), 2023-02-17
Supplement: s1 [file s1]

# A Facile and Rapid Strategy for Quantifying PCBs in Cereals Based on Dispersive Solid-Phase Extraction and Gas Chromatography-Mass Spectrometry: A Reference for Safety Concern in Sustainable Textiles

Tengfei Liu <sup>1,2</sup>, Ying Song <sup>2</sup>, Xiangyun Wang <sup>1,\*</sup>, Linlin Shi <sup>2</sup>, Minghui Dong <sup>2</sup>

<sup>1</sup> Key Laboratory of Detection for Pesticide Residues and Control of Zhejiang Province, Hangzhou 310021, China; liutengfei@jaas.ac.cn (T.L.)

<sup>2</sup> Jiangsu Taihu Area Institute of Agricultural Sciences, Suzhou 215105, China; songyingkjc@sina.com (Y.S.); 20113002@jaas.ac.cn (L.S.); dmhsaas@163.com (M.D.)

\* Correspondence: wxy\_zas@163.com (X.W.)

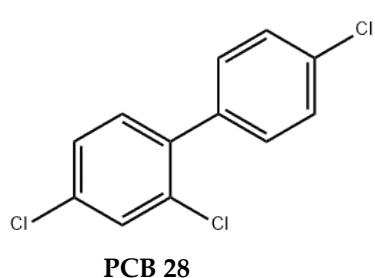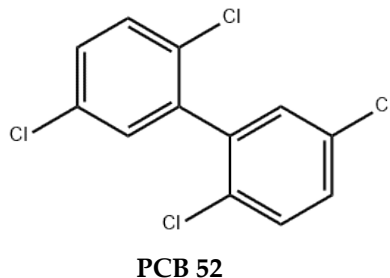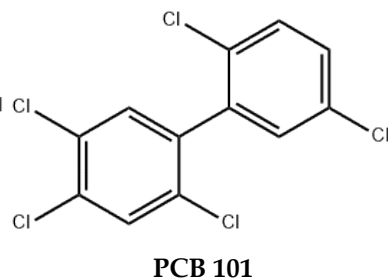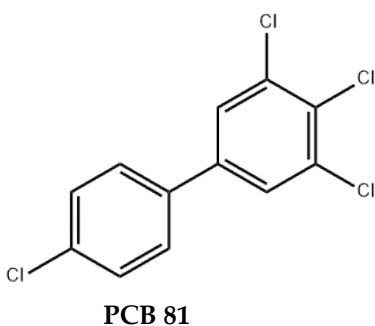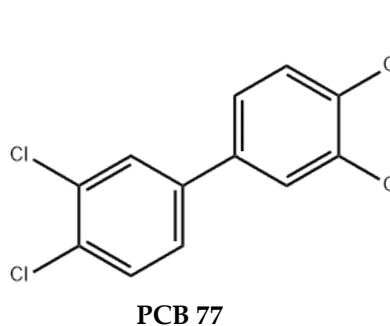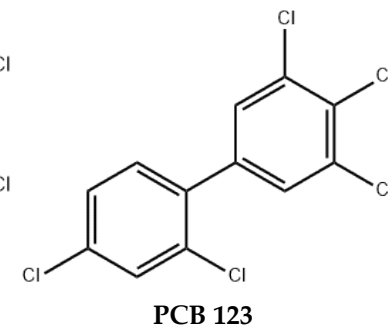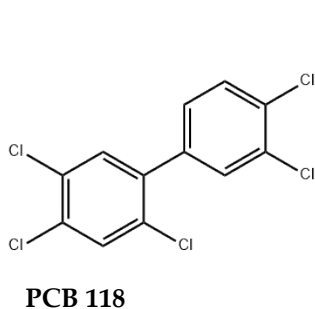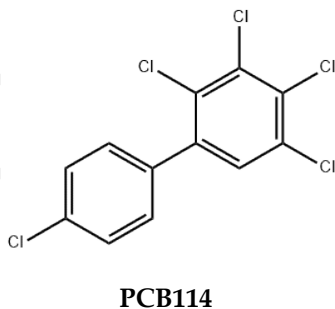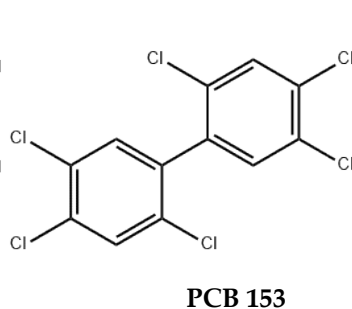

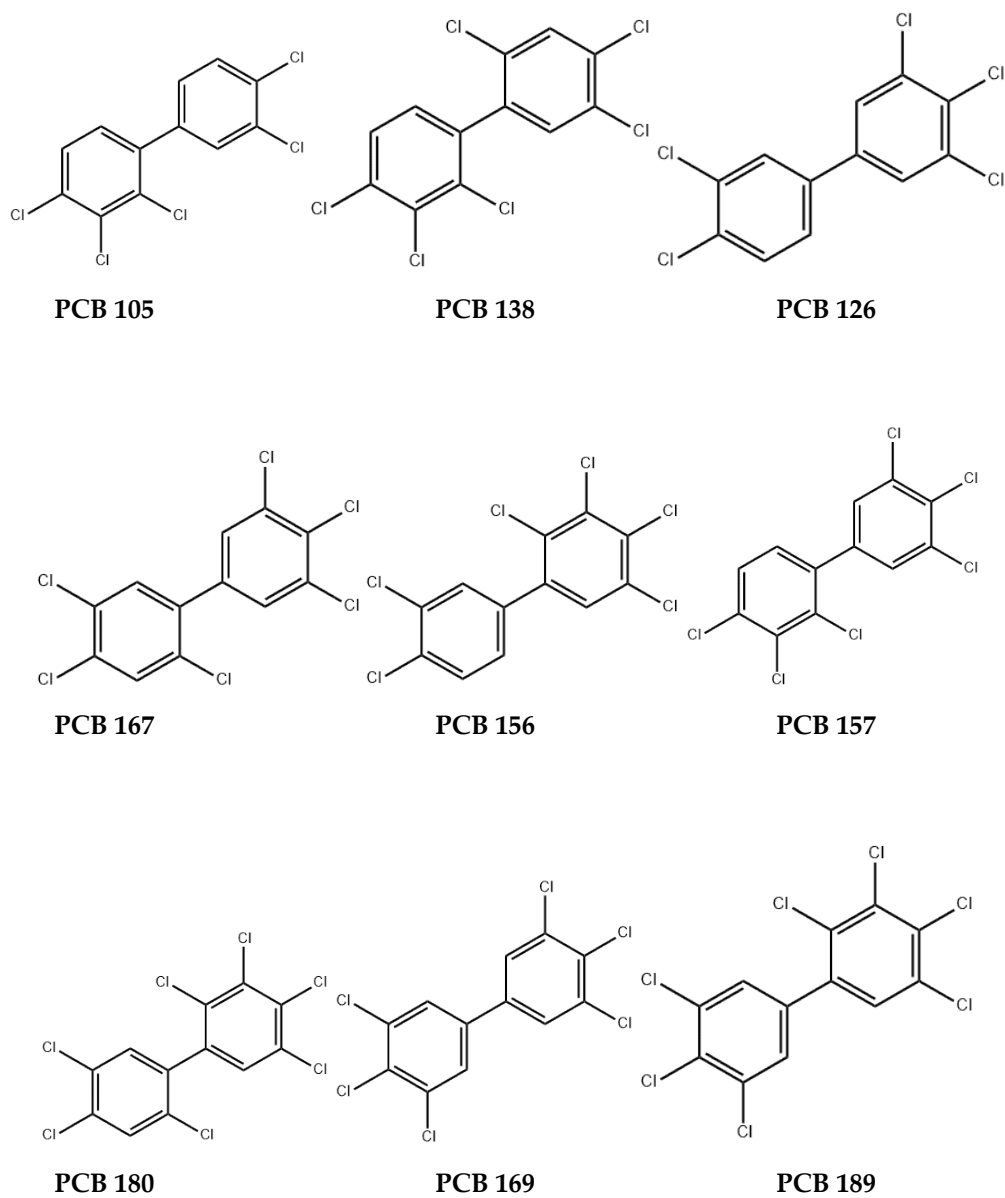

**Figure S1.** Structural formula of the selected PCB congeners.

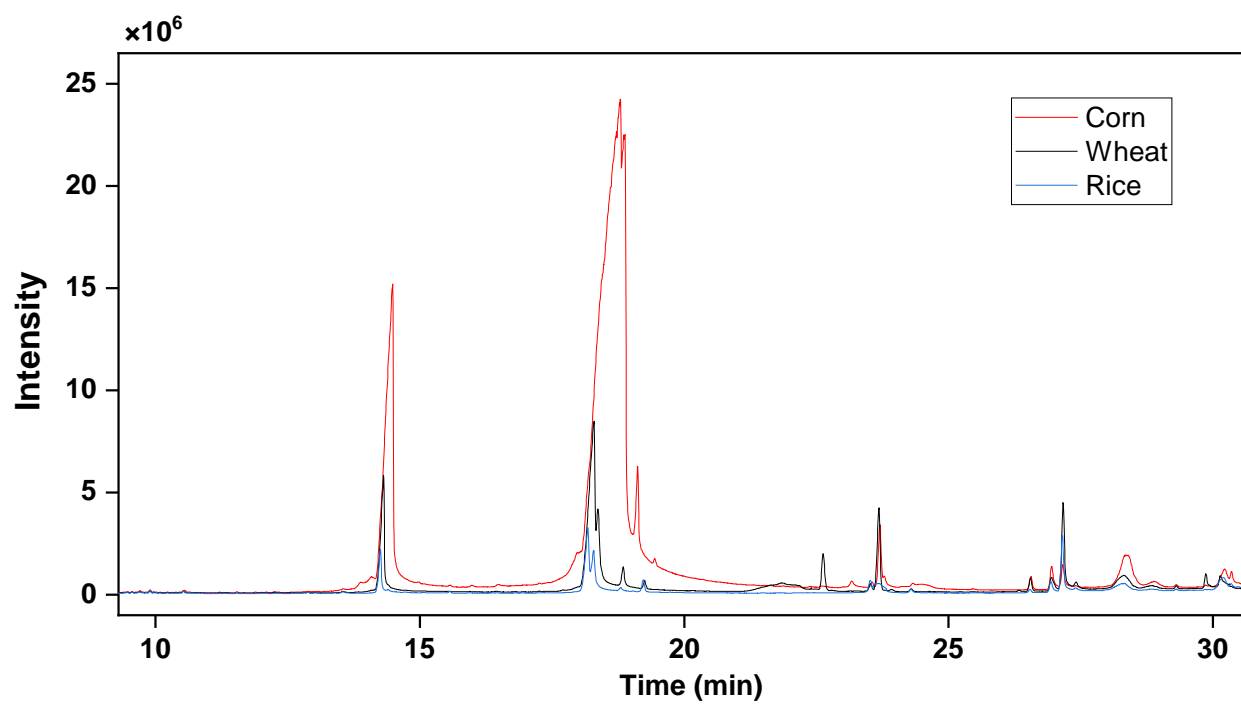

Figure S2. Total ion chromatogram of corn, wheat and rice extracts.

**Table S1.** Retention time, qualitative ion and quantitative ion of target PCBs.

| Analyte | Group no. | Retention time<br>(min) | Qualitative<br>ion | Quantitative<br>ion |
|---------|-----------|-------------------------|--------------------|---------------------|
| PCB28   | 1         | 12.44                   | 258,186            | 256                 |
| PCB52   | 2         | 13.63                   | 220,290            | 292                 |
| PCB101  | 3         | 17.30                   | 254,328            | 326                 |
| PCB81   | 4         | 18.51                   | 289,294            | 292                 |
| PCB77   | 4         | 18.98                   | 289,294            | 292                 |
| PCB123  | 5         | 20.14                   | 328,324            | 326                 |
| PCB118  | 5         | 20.24                   | 328,324            | 326                 |
| PCB114  | 5         | 20.78                   | 328,324            | 326                 |
| PCB153  | 5         | 21.40                   | 362,290            | 360                 |
| PCB105  | 5         | 21.53                   | 328,324            | 326                 |
| PCB138  | 6         | 22.75                   | 362,290            | 360                 |
| PCB126  | 6         | 23.20                   | 328,324            | 326                 |
| PCB167  | 7         | 24.24                   | 362,290            | 360                 |
| PCB156  | 8         | 25.39                   | 362,358            | 360                 |
| PCB157  | 8         | 25.69                   | 362,290            | 360                 |
| PCB180  | 9         | 26.32                   | 396,323            | 394                 |
| PCB169  | 10        | 27.53                   | 362,358            | 360                 |
| PCB189  | 11        | 29.49                   | 396,324            | 394                 |

**Table S2.** Linear ranges, regression equations, correlation coefficients, LODs and LOQs of 18 PCBs.

| Analyte | Linear range<br>(µg/L) | Regression equation <sup>a</sup> | <i>r</i> | LODs(µg/kg) |       |      | LOQs(µg/kg) |       |      | Dry matter(%) |       |      |
|---------|------------------------|----------------------------------|----------|-------------|-------|------|-------------|-------|------|---------------|-------|------|
|         |                        |                                  |          | Corn        | Wheat | Rice | Corn        | Wheat | Rice | Corn          | Wheat | Rice |
| PCB28   | 0.5-50                 | y=210.45x-45.571                 | 0.9986   | 0.04        | 0.05  | 0.04 | 0.1         | 0.2   | 0.1  |               |       |      |
| PCB52   | 0.5-50                 | y=111.67x-12.967                 | 0.9985   | 0.08        | 0.1   | 0.08 | 0.3         | 0.3   | 0.3  |               |       |      |
| PCB101  | 0.5-50                 | y=140.54x-16.291                 | 0.9983   | 0.08        | 0.09  | 0.08 | 0.3         | 0.3   | 0.3  |               |       |      |
| PCB81   | 0.5-50                 | y=190.24x-63.062                 | 0.9983   | 0.08        | 0.08  | 0.08 | 0.3         | 0.3   | 0.3  |               |       |      |
| PCB77   | 0.5-50                 | y=194.62x-72.637                 | 0.9985   | 0.08        | 0.08  | 0.08 | 0.3         | 0.3   | 0.3  |               |       |      |
| PCB123  | 0.5-50                 | y=169.87x-38.121                 | 0.9983   | 0.07        | 0.08  | 0.07 | 0.2         | 0.3   | 0.2  |               |       |      |
| PCB118  | 0.5-50                 | y=184.58x-36.303                 | 0.9985   | 0.07        | 0.07  | 0.07 | 0.2         | 0.2   | 0.2  |               |       |      |
| PCB114  | 0.5-50                 | y=170.79x-30.792                 | 0.9983   | 0.07        | 0.07  | 0.07 | 0.2         | 0.2   | 0.2  |               |       |      |
| PCB153  | 0.5-50                 | y=126.87x-12.276                 | 0.9982   | 0.09        | 0.09  | 0.09 | 0.3         | 0.3   | 0.3  | 85.9          | 86.8  | 85.7 |
| PCB105  | 0.5-50                 | y=172.18x-43.167                 | 0.9984   | 0.08        | 0.08  | 0.08 | 0.3         | 0.3   | 0.3  |               |       |      |
| PCB138  | 0.5-50                 | y=114.57x-12.376                 | 0.9982   | 0.1         | 0.09  | 0.1  | 0.4         | 0.3   | 0.3  |               |       |      |
| PCB126  | 0.5-50                 | y=159.10x-43.487                 | 0.9982   | 0.08        | 0.09  | 0.08 | 0.3         | 0.3   | 0.3  |               |       |      |
| PCB167  | 0.5-50                 | y=145.28x-26.777                 | 0.9982   | 0.09        | 0.09  | 0.09 | 0.3         | 0.3   | 0.3  |               |       |      |
| PCB156  | 0.5-50                 | y=140.07x-25.584                 | 0.9980   | 0.1         | 0.1   | 0.1  | 0.3         | 0.3   | 0.3  |               |       |      |
| PCB157  | 0.5-50                 | y=139.20x-22.427                 | 0.9979   | 0.1         | 0.1   | 0.1  | 0.3         | 0.4   | 0.3  |               |       |      |
| PCB180  | 0.5-50                 | y=91.999x-5.5179                 | 0.9978   | 0.1         | 0.1   | 0.1  | 0.4         | 0.3   | 0.3  |               |       |      |
| PCB169  | 0.5-50                 | y=137.72x-36.668                 | 0.9980   | 0.09        | 0.1   | 0.1  | 0.3         | 0.4   | 0.3  |               |       |      |
| PCB189  | 0.5-50                 | y=113.04x-12.089                 | 0.9980   | 0.1         | 0.08  | 0.1  | 0.3         | 0.3   | 0.3  |               |       |      |

<sup>a</sup> x = concentration (µg/L), y = peak area.

**Table S3.** The recoveries and RSDs of proposed method for the spiked samples at different levels.

| Analyte | Mean recoveries and RSDs (% , n=6) |              |               |                |              |               |                |              |               |
|---------|------------------------------------|--------------|---------------|----------------|--------------|---------------|----------------|--------------|---------------|
|         | Corn                               |              |               | Wheat          |              |               | Rice           |              |               |
|         | 0.5<br>(µg/kg)                     | 5<br>(µg/kg) | 10<br>(µg/kg) | 0.5<br>(µg/kg) | 5<br>(µg/kg) | 10<br>(µg/kg) | 0.5<br>(µg/kg) | 5<br>(µg/kg) | 10<br>(µg/kg) |
| PCB28   | 87.8±7.8                           | 93.5±4.8     | 101.5±2.7     | 86.4±9.4       | 96.5±5.0     | 100.2±3.5     | 82.5±1.7       | 98.1±4.1     | 94.3±5.2      |
| PCB52   | 103.7±6.4                          | 101.6±6.0    | 109.1±8.2     | 84.2±3.7       | 99.1±7.5     | 100.7±3.3     | 85.4±4.5       | 101.9±4.0    | 97.7±6.4      |
| PCB101  | 96.1±6.5                           | 96.1±4.3     | 108.0±7.6     | 86.6±5.2       | 98.6±5.5     | 102.3±4.0     | 79.2±4.5       | 99.3±3.6     | 99.0±5.5      |
| PCB81   | 95.7±9.7                           | 91.7±8.2     | 101.7±5.3     | 93.9±5.2       | 94.9±4.1     | 98.9±2.4      | 87.9±5.3       | 95.2±2.4     | 91.6±8.0      |
| PCB77   | 100.2±5.1                          | 92.3±4.5     | 95.8±5.3      | 84.1±9.1       | 97.8±8.1     | 97.4±7.1      | 87.0±7.3       | 96.0±4.1     | 88.1±1.5      |
| PCB123  | 107.4±5.5                          | 98.0±5.3     | 104.7±6.3     | 89.9±9.4       | 102.1±3.4    | 103.7±5.4     | 85.5±3.6       | 99.4±3.8     | 110.5±1.5     |
| PCB118  | 104.3±3.3                          | 93.4±5.8     | 105.1±3.5     | 84.9±4.5       | 101.7±6.0    | 102.2±4.4     | 85.2±6.5       | 99.9±2.4     | 96.2±3.2      |
| PCB114  | 102.6±4.5                          | 94.9±5.1     | 103.2±2.7     | 89.0±6.0       | 101.4±5.5    | 100.6±3.5     | 86.8±4.2       | 99.9±5.8     | 98.1±8.6      |
| PCB153  | 85.3±6.4                           | 100.3±6.0    | 102.1±3.1     | 84.5±7.0       | 100.2±5.9    | 104.1±1.9     | 82.7±6.0       | 99.8±4.7     | 97.8±5.2      |
| PCB105  | 84.6±10.3                          | 93.6±3.8     | 100.2±2.7     | 83.7±6.0       | 98.4±5.2     | 99.3±3.3      | 84.1±5.4       | 98.3±3.5     | 93.9±4.2      |
| PCB138  | 97.7±8.9                           | 97.8±2.5     | 94.7±3.0      | 84.6±7.1       | 96.4±4.6     | 106.9±4.0     | 86.9±7.1       | 95.8±2.1     | 97.4±2.8      |
| PCB126  | 106.5±8.5                          | 94.7±3.0     | 99.5±2.5      | 82.9±7.1       | 99.3±4.7     | 96.6±4.1      | 82.8±7.5       | 95.9±4.6     | 94.7±2.0      |
| PCB167  | 105.9±7.1                          | 96.7±3.0     | 102.7±4.5     | 82.2±7.5       | 101.4±5.0    | 101.9±4.0     | 85.2±4.9       | 99.3±3.6     | 96.3±1.9      |
| PCB156  | 105.2±7.6                          | 94.1±2.8     | 99.4±2.5      | 89.3±5.6       | 100.0±4.2    | 102.6±2.2     | 88.5±4.9       | 98.7±3.8     | 96.1±3.2      |
| PCB157  | 99.1±8.8                           | 91.9±3.5     | 98.8±3.1      | 79.4±3.5       | 98.5±4.3     | 101.0±4.6     | 82.5±5.3       | 99.9±5.4     | 96.9±3.2      |
| PCB180  | 98.5±9.7                           | 96.7±5.4     | 103.5±5.5     | 83.2±2.7       | 95.9±4.2     | 105.4±2.0     | 92.4±7.4       | 100±5.0      | 100.4±2.2     |
| PCB169  | 87.5±5.5                           | 95.9±5.2     | 98.1±1.6      | 79.9±6.0       | 99.0±4.3     | 98.3±2.4      | 89.6±4.3       | 98.9±3.9     | 95.3±5.0      |
| PCB189  | 93.0±9.0                           | 95.6±2.9     | 98.2±2.3      | 80.1±8.5       | 100.2±5.9    | 105.5±4.0     | 88.1±2.0       | 98.4±3.4     | 98.0±3.7      |
